# Supplementary material for: Food-Grade Quercetin-Loaded Nanoemulsion Ameliorates Effects Associated with Parkinson’s Disease and Cancer: Studies Employing a Transgenic C. elegans Model and Human Cancer Cell Lines
Source: MDPI journal article supplement (doi:10.3390/antiox11071378), 2022-07-15
Supplement: s1 [file s1]

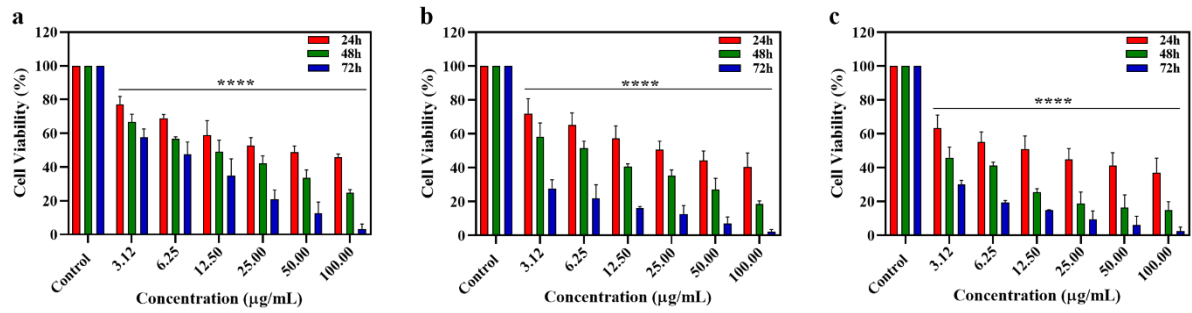

**Figure S1.** The percentage of cell viability of DOX were calculated in a dose-and time-dependent manner using MTT test on different human cancer cells: A549 (a), HeLa (b), and MIA PaCa-2 cells (c). The data were analyzed using GraphPad Prism 9.0 software and represented as mean  $\pm$  SD ( $n = 3$ ). The obtained results for DOX were further examined using two-way ANOVA analysis. The p-value were signified as \* $p < 0.05$ , \*\* $p < 0.01$ , \*\*\* $p < 0.001$ , \*\*\*\* $p < 0.0001$ .
